# Supplementary material
Source: PubMed Central journal article supplement (PMC1885601)

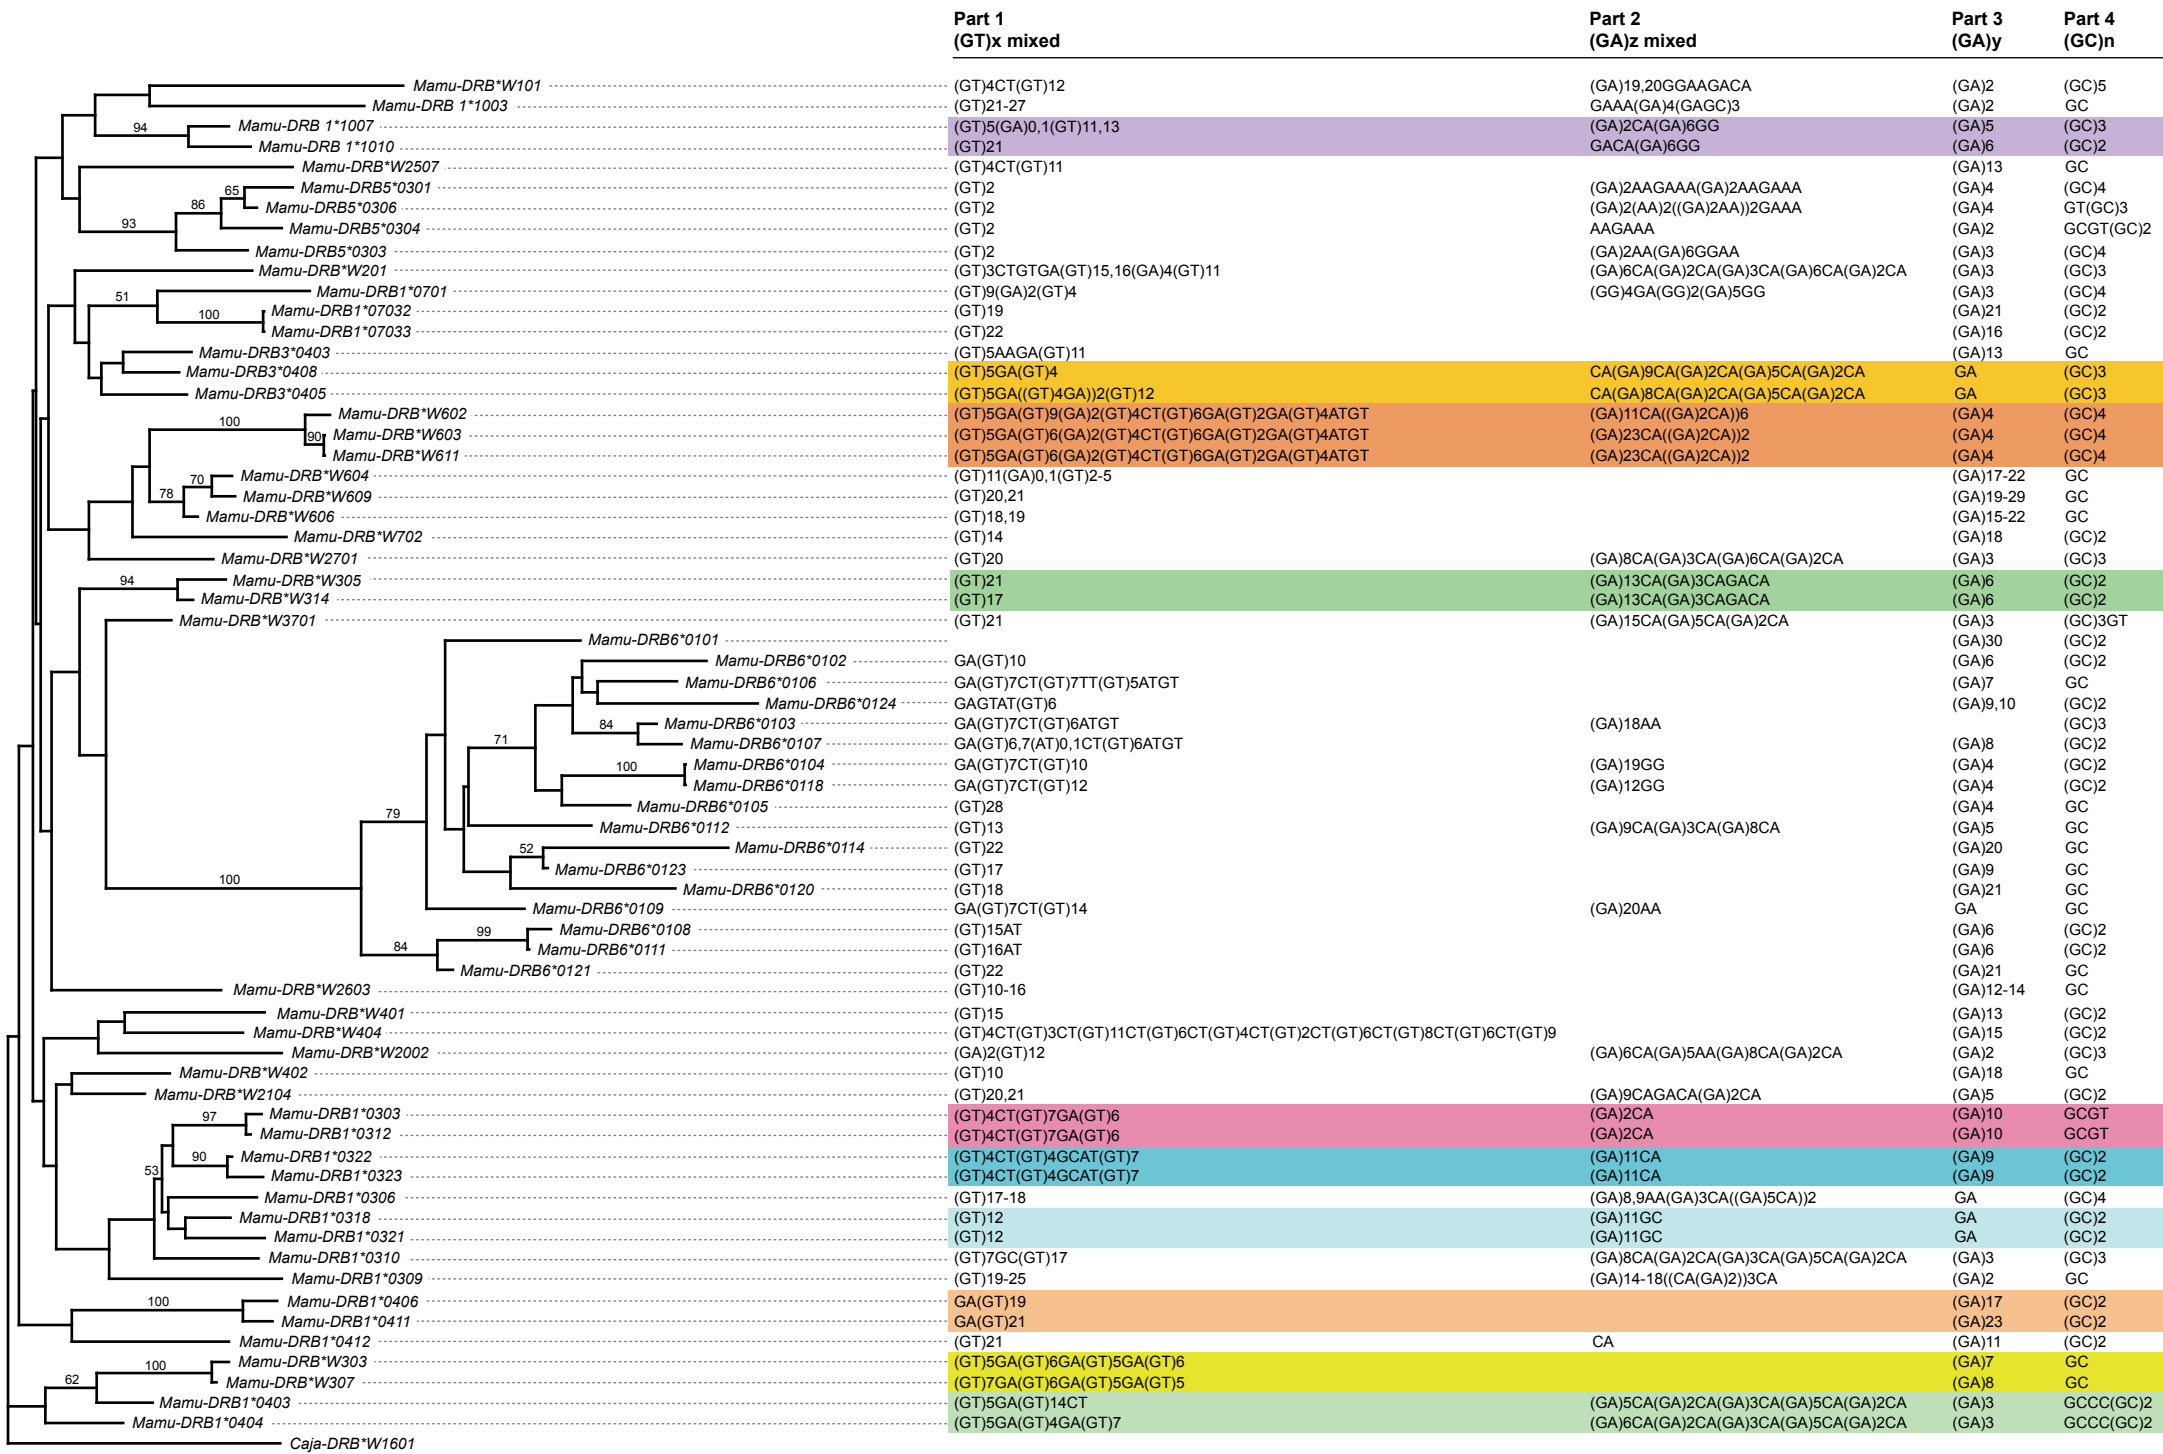

0.01 substitutions/site

Supplement: pnas_0702964104_1.pdf [file pnas_0702964104_1.pdf]
